# Supplementary material for: Ferroelastic-like transition and solvents affect the magnetism of a copper–organic radical one-dimensional coordination polymer
Source: Royal Society of Chemistry journal article supplement (doi:10.1039/d2dt00135g), 2022-01-01
Supplement: d2dt00135g1.pdf [file d2dt00135g1.pdf]

## Supporting Information

### **Ferroelasticity-like and solvent affect the magnetism of a copper-organic radical one-dimensional coordination polymer**

Yan-Li Gao,<sup>a</sup> Sadafumi Nishihara,<sup>b</sup> Takashi Suzuki,<sup>b</sup> Kazunori Umeo,<sup>b</sup> Katsuya Inoue,<sup>\*b</sup>  
and Mohamedally Kurmoo<sup>\*c</sup>

<sup>a</sup> School of Chemistry and Chemical Engineering, Yulin University, Yulin 719000, China.

<sup>b</sup> Department of Chemistry and Center for Chiral Science, Hiroshima University, 1-3-1 Kagamiyama, Higashi-Hiroshima, Hiroshima, 739-8526 Japan.

<sup>c</sup> Institut de Chimie de Strasbourg, CNRS-UMR7177, Université de Strasbourg, 4 rue Blaise Pascal, 67070 Strasbourg, France.

**Table S1.** Crystallographic and refinement data for **1·CH<sub>2</sub>Cl<sub>2</sub>**.

| Crystal                         | AA                                                                                                              | BB                                                                                                              | CC                                                                                                              |
|---------------------------------|-----------------------------------------------------------------------------------------------------------------|-----------------------------------------------------------------------------------------------------------------|-----------------------------------------------------------------------------------------------------------------|
| T (K)                           | 296(2)                                                                                                          | 296(2)                                                                                                          | 100(2)                                                                                                          |
| formula                         | C <sub>51</sub> H <sub>36</sub> Cu <sub>3</sub> F <sub>36</sub> N <sub>16</sub> O <sub>16</sub> Cl <sub>2</sub> | C <sub>51</sub> H <sub>36</sub> Cu <sub>3</sub> F <sub>36</sub> N <sub>16</sub> O <sub>16</sub> Cl <sub>2</sub> | C <sub>51</sub> H <sub>36</sub> Cu <sub>3</sub> F <sub>36</sub> N <sub>16</sub> O <sub>16</sub> Cl <sub>2</sub> |
| fw                              | 1906.4                                                                                                          | 1906.4                                                                                                          | 1906.4                                                                                                          |
| cryst syst                      | Triclinic                                                                                                       | Triclinic                                                                                                       | Triclinic                                                                                                       |
| space group                     | <i>P</i> -1                                                                                                     | <i>P</i> -1                                                                                                     | <i>P</i> -1                                                                                                     |
| a (Å)                           | 11.842(1)                                                                                                       | 11.831(1)                                                                                                       | 11.482(1)                                                                                                       |
| b (Å)                           | 12.992(1)                                                                                                       | 12.989(1)                                                                                                       | 12.833(1)                                                                                                       |
| c (Å)                           | 23.268(1)                                                                                                       | 23.257(1)                                                                                                       | 23.085(1)                                                                                                       |
| α (°)                           | 86.393(1)                                                                                                       | 86.396(1)                                                                                                       | 86.454(2)                                                                                                       |
| β (°)                           | 82.851(1)                                                                                                       | 82.885(1)                                                                                                       | 82.297(2)                                                                                                       |
| γ (°)                           | 86.258(1)                                                                                                       | 86.253(1)                                                                                                       | 86.259(2)                                                                                                       |
| <i>V</i> (Å <sup>3</sup> )      | 3539.1(3)                                                                                                       | 3533.3(3)                                                                                                       | 3358.8(3)                                                                                                       |
| <i>Z</i>                        | 2                                                                                                               | 2                                                                                                               | 2                                                                                                               |
| Refls. Total                    | 94867                                                                                                           | 92780                                                                                                           | 120063                                                                                                          |
| Unique                          | 17492                                                                                                           | 17433                                                                                                           | 17182                                                                                                           |
| Param.                          | 1020                                                                                                            | 1020                                                                                                            | 1047                                                                                                            |
| R <sub>int</sub>                | 0.0248                                                                                                          | 0.0263                                                                                                          | 0.0401                                                                                                          |
| R <sub>1</sub> /wR <sub>2</sub> | 0.0578                                                                                                          | 0.0592                                                                                                          | 0.0448                                                                                                          |
| <i>[I</i> > 2σ( <i>I</i> )]     | 0.1627                                                                                                          | 0.1620                                                                                                          | 0.1153                                                                                                          |
| R <sub>1</sub> /wR <sub>2</sub> | 0.0784                                                                                                          | 0.0785                                                                                                          | 0.0561                                                                                                          |
| (all data)                      | 0.1816                                                                                                          | 0.1806                                                                                                          | 0.1215                                                                                                          |
| GoF                             | 1.042                                                                                                           | 1.048                                                                                                           | 1.096                                                                                                           |

**Table S2.** Crystallographic and refinement data for **1'**.

| Crystal                         | <b>B</b>                                                                                             | <b>A</b>                                                                                             | <b>C</b>                                                                                             | <b>A</b>                                                                                             | <b>D</b>                                                                                             | <b>A</b>                                                                                             |
|---------------------------------|------------------------------------------------------------------------------------------------------|------------------------------------------------------------------------------------------------------|------------------------------------------------------------------------------------------------------|------------------------------------------------------------------------------------------------------|------------------------------------------------------------------------------------------------------|------------------------------------------------------------------------------------------------------|
| T (K)                           | 296(2)                                                                                               | 200(2)                                                                                               | 173(2)                                                                                               | 130(2)                                                                                               | 100(2)                                                                                               | 85(2)                                                                                                |
| formula                         | C <sub>25</sub> H <sub>17</sub> Cu <sub>1</sub> .<br>5 F <sub>18</sub> N <sub>2</sub> O <sub>8</sub> | C <sub>25</sub> H <sub>17</sub> Cu <sub>1</sub> .<br>5 F <sub>18</sub> N <sub>2</sub> O <sub>8</sub> | C <sub>25</sub> H <sub>17</sub> Cu <sub>1</sub> .<br>5 F <sub>18</sub> N <sub>2</sub> O <sub>8</sub> | C <sub>25</sub> H <sub>17</sub> Cu <sub>1</sub> .<br>5 F <sub>18</sub> N <sub>2</sub> O <sub>8</sub> | C <sub>25</sub> H <sub>17</sub> Cu <sub>1</sub> .<br>5 F <sub>18</sub> N <sub>2</sub> O <sub>8</sub> | C <sub>25</sub> H <sub>17</sub> Cu <sub>1</sub> .<br>5 F <sub>18</sub> N <sub>2</sub> O <sub>8</sub> |
| fw                              | 910.7                                                                                                | 910.7                                                                                                | 910.7                                                                                                | 910.7                                                                                                | 910.7                                                                                                | 910.7                                                                                                |
| cryst syst                      | Monoclinic                                                                                           | Monoclinic                                                                                           | Monoclinic                                                                                           | Monoclinic                                                                                           | Monoclinic                                                                                           | Monoclinic                                                                                           |
| space group                     | <i>P 2/n</i>                                                                                         |
| a (Å)                           | 13.936(1)                                                                                            | 13.797(1)                                                                                            | 13.742(1)                                                                                            | 13.601(1)                                                                                            | 13.488(1)                                                                                            | 13.458(4)                                                                                            |
| b (Å)                           | 16.422(1)                                                                                            | 16.331(1)                                                                                            | 16.308(1)                                                                                            | 16.442(1)                                                                                            | 15.967(1)                                                                                            | 15.961(4)                                                                                            |
| c (Å)                           | 16.492(1)                                                                                            | 16.425(1)                                                                                            | 16.436(1)                                                                                            | 16.354(1)                                                                                            | 17.039(1)                                                                                            | 17.039(4)                                                                                            |
| $\alpha$ (°)                    | 90.00                                                                                                | 90.00                                                                                                | 90.00                                                                                                | 90.00                                                                                                | 90.00                                                                                                | 90.00                                                                                                |
| $\beta$ (°)                     | 97.969(1)                                                                                            | 97.553(1)                                                                                            | 97.467(2)                                                                                            | 97.576(2)                                                                                            | 95.059(2)                                                                                            | 95.050(7)                                                                                            |
| $\gamma$ (°)                    | 90.00                                                                                                | 90.00                                                                                                | 90.00                                                                                                | 90.00                                                                                                | 90.00                                                                                                | 90.00                                                                                                |
| <i>V</i> (Å <sup>3</sup> )      | 3737.9(3)                                                                                            | 3668.8(3)                                                                                            | 3652.2(3)                                                                                            | 3625.3(4)                                                                                            | 3655.3(4)                                                                                            | 3645.9(2)                                                                                            |
| Z                               | 4                                                                                                    | 4                                                                                                    | 4                                                                                                    | 4                                                                                                    | 4                                                                                                    | 4                                                                                                    |
| Refls. Total                    | 59216                                                                                                | 57238                                                                                                | 55791                                                                                                | 49552                                                                                                | 51329                                                                                                | 30545                                                                                                |
| Unique                          | 9286                                                                                                 | 9137                                                                                                 | 9156                                                                                                 | 9021                                                                                                 | 9071                                                                                                 | 8933                                                                                                 |
| Param.                          | 498                                                                                                  | 498                                                                                                  | 498                                                                                                  | 498                                                                                                  | 498                                                                                                  | 498                                                                                                  |
| R <sub>int</sub>                | 0.0275                                                                                               | 0.0253                                                                                               | 0.0385                                                                                               | 0.0394                                                                                               | 0.0319                                                                                               | 0.1053                                                                                               |
| R <sub>1</sub> /wR <sub>2</sub> | 0.0719                                                                                               | 0.0662                                                                                               | 0.0670                                                                                               | 0.0823                                                                                               | 0.0902                                                                                               | 0.1522                                                                                               |
| [ <i>I</i> > 2σ( <i>I</i> )]    | 0.2041                                                                                               | 0.1843                                                                                               | 0.1756                                                                                               | 0.2372                                                                                               | 0.2765                                                                                               | 0.4142                                                                                               |
| R <sub>1</sub> /wR <sub>2</sub> | 0.1010                                                                                               | 0.0834                                                                                               | 0.1016                                                                                               | 0.1079                                                                                               | 0.1100                                                                                               | 0.2360                                                                                               |
| (all data)                      | 0.2322                                                                                               | 0.2035                                                                                               | 0.2017                                                                                               | 0.2673                                                                                               | 0.3041                                                                                               | 0.4716                                                                                               |
| GoF                             | 1.050                                                                                                | 1.032                                                                                                | 1.026                                                                                                | 1.051                                                                                                | 1.038                                                                                                | 1.545                                                                                                |

**Table S3.** Intramolecular dimensions as a function of temperature for **1·CH<sub>2</sub>Cl<sub>2</sub>** and **1'**.

| 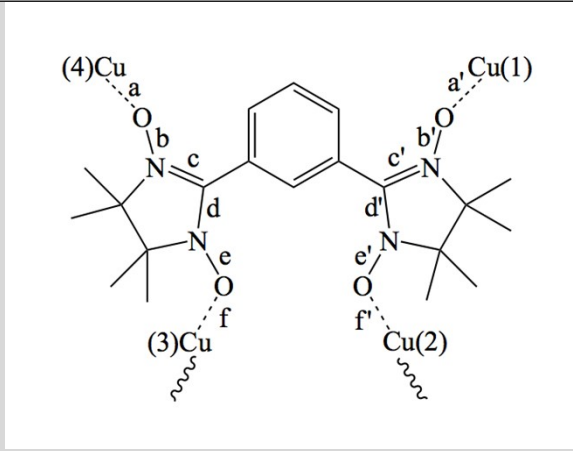 |       |               |               |               |               |               |               |                      |                      |
|------------------------------------------------------------------------------------|-------|---------------|---------------|---------------|---------------|---------------|---------------|----------------------|----------------------|
| <b>1·CH<sub>2</sub>Cl<sub>2</sub></b>                                              |       |               |               |               |               |               |               |                      |                      |
| Crystal                                                                            | T (K) | <b>a (Å)</b>  | <b>b (Å)</b>  | <b>c (Å)</b>  | <b>d (Å)</b>  | <b>e (Å)</b>  | <b>f (Å)</b>  | <b>N4-O4-Cu4 (°)</b> | <b>N3-O2-Cu3 (°)</b> |
| AA                                                                                 | 296   | 2.032         | 1.292         | 1.344         | 1.352         | 1.271         | 2.711         | 121.48               | 144.81               |
| BB                                                                                 | 296   | 2.031         | 1.293         | 1.345         | 1.353         | 1.273         | 2.709         | 121.73               | 144.83               |
| CC                                                                                 | 100   | 1.999         | 1.297         | 1.353         | 1.358         | 1.277         | 2.653         | 120.77               | 142.64               |
|                                                                                    |       | <b>a' (Å)</b> | <b>b' (Å)</b> | <b>c' (Å)</b> | <b>d' (Å)</b> | <b>e' (Å)</b> | <b>f' (Å)</b> | <b>N1-O1-Cu1 (°)</b> | <b>N2-O2-Cu2 (°)</b> |
| AA                                                                                 | 296   | 2.263         | 1.289         | 1.338         | 1.357         | 1.276         | 2.642         | 126.80               | 154.36               |
| BB                                                                                 | 296   | 2.264         | 1.288         | 1.340         | 1.358         | 1.271         | 2.643         | 126.83               | 154.21               |
| CC                                                                                 | 100   | 2.258         | 1.295         | 1.349         | 1.363         | 1.276         | 2.559         | 125.81               | 155.87               |
| <b>1'</b>                                                                          |       |               |               |               |               |               |               |                      |                      |
| Crystal                                                                            | T (K) | <b>a (Å)</b>  | <b>b (Å)</b>  | <b>c (Å)</b>  | <b>d (Å)</b>  | <b>e (Å)</b>  | <b>f (Å)</b>  | <b>N2-O2-Cu2 (°)</b> | <b>N1-O1-Cu1 (°)</b> |
| A                                                                                  | 300   | 2.189         | 1.291         | 1.343         | 1.353         | 1.275         | 2.464         | 125.16               | 155.75               |
| B                                                                                  | 296   | 2.190         | 1.290         | 1.343         | 1.352         | 1.276         | 2.462         | 125.19               | 155.66               |
| A                                                                                  | 200   | 2.173         | 1.295         | 1.341         | 1.355         | 1.276         | 2.429         | 124.26               | 156.05               |
| C                                                                                  | 173   | 2.174         | 1.292         | 1.343         | 1.360         | 1.273         | 2.421         | 124.28               | 156.20               |
| A                                                                                  | 130   | 2.151         | 1.296         | 1.345         | 1.358         | 1.269         | 2.431         | 123.98               | 156.48               |
| D                                                                                  | 100   | 2.219         | 1.292         | 1.349         | 1.360         | 1.267         | 2.410         | 123.00               | 163.49               |
| A                                                                                  | 85    | 2.224         | 1.294         | 1.337         | 1.358         | 1.255         | 2.417         | 123.33               | 161.88               |

## Thermogravimetric Analyses

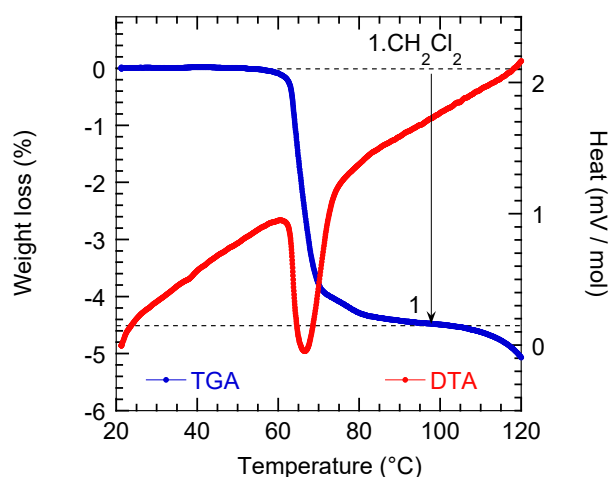

**Figure S1.** TG and DTA showing the transformation of  $1 \cdot \text{CH}_2\text{Cl}_2$  to  $1$ .

$1 \cdot \text{CH}_2\text{Cl}_2$  loses 4.3% of its weight at 65 °C (Figure S1), which corresponds to the departure of the  $\text{CH}_2\text{Cl}_2$ . The shiny black crystals used in this experiment crumbled into a dark green powder after heating to 100 °C.

## Infrared Spectroscopy

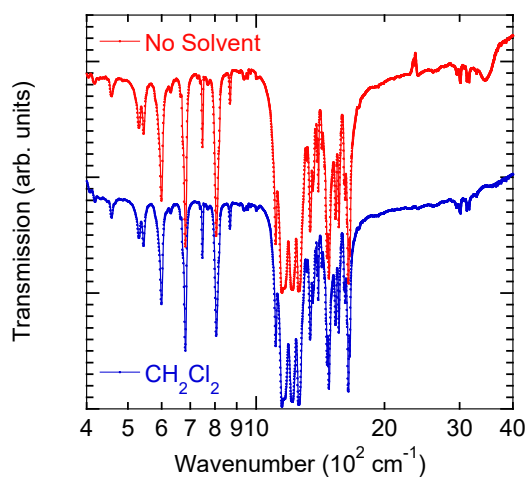

**Figure S2.** Infrared spectra of  $1 \cdot \text{CH}_2\text{Cl}_2$  and  $1'$ .

The infrared spectra of  $1 \cdot \text{CH}_2\text{Cl}_2$  and  $1'$  (Figure S2), which originate principally from the organic ligands, are almost identical with respect to the energies of the bands and their intensities. The result indicates that the ligands are not perturbed by the slight differences in structures. However, the lack of a solvent  $\nu(\text{C}-\text{Cl})$  band may indicate that the pressure used to make the KBr pellet has removed the solvent.

## Crystal Structure

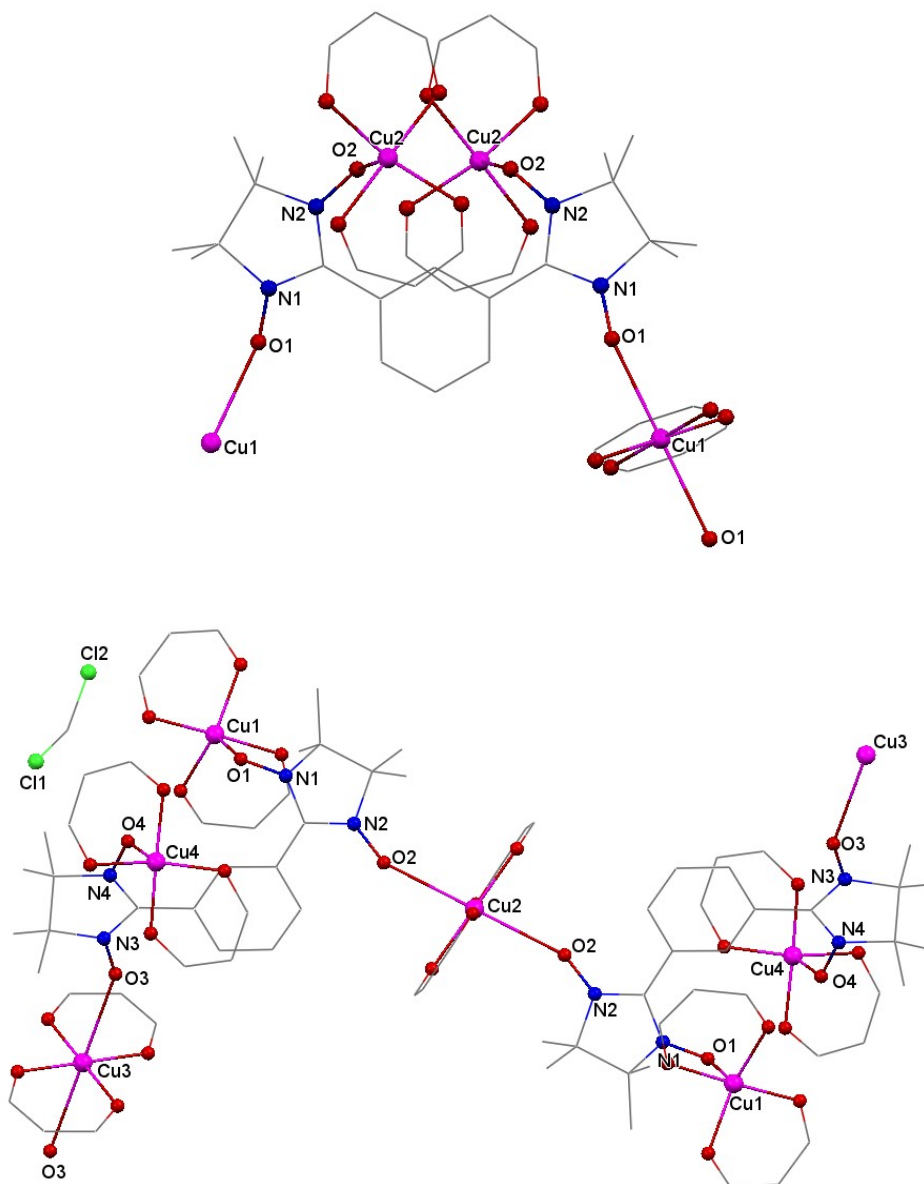

**Figure S3.** Fragment of molecular structure of  $\{Cu^{II}(hfac)_2\}_3(m-BNN)$  (top) and  $\{[Cu^{II}(hfac)_2]_3(m-BNN)\}_n \cdot nCH_2Cl_2$  (below). Color codes for atoms: magenta spheres, Cu; Red spheres, O; blue spheres, N; grey spheres, C; green spheres, Cl. All  $CF_3$  groups and hydrogen atoms were omitted for the sake of clarity.

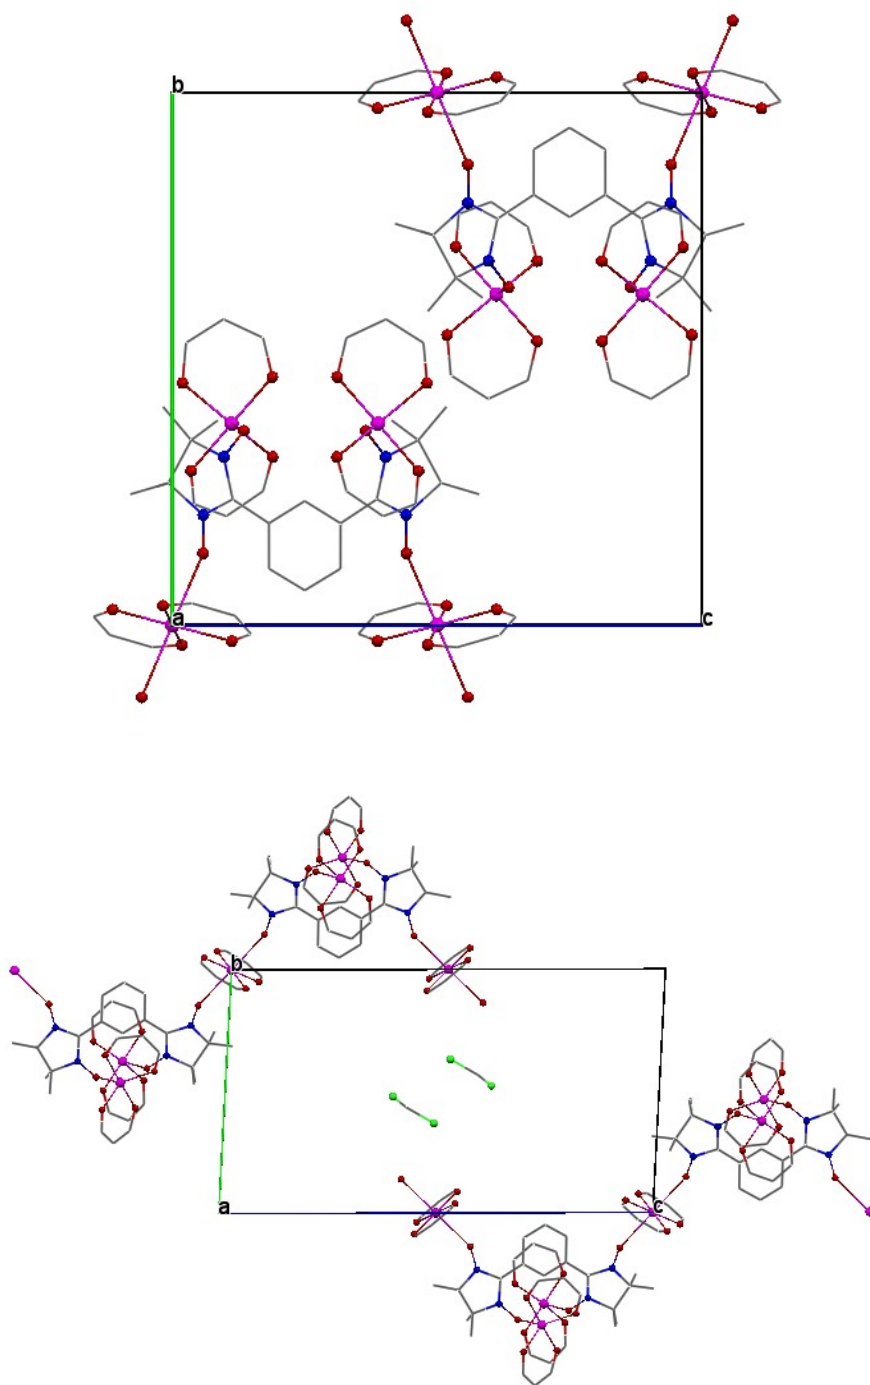

**Figure S4.** Details of the crystal packing of  $\{\text{Cu}^{\text{II}}(\text{hfac})_2\}_3(m\text{-BNN})\}$  (top) and  $\{\text{Cu}^{\text{II}}(\text{hfac})_2\}_3(m\text{-BNN})\cdot\text{CH}_2\text{Cl}_2\}$  (below). Color codes for atoms: magenta spheres, Cu; red spheres, O; blue spheres, N; grey spheres, C; green spheres, Cl. All  $\text{CF}_3$  groups and hydrogen atoms were omitted for the sake of clarity.

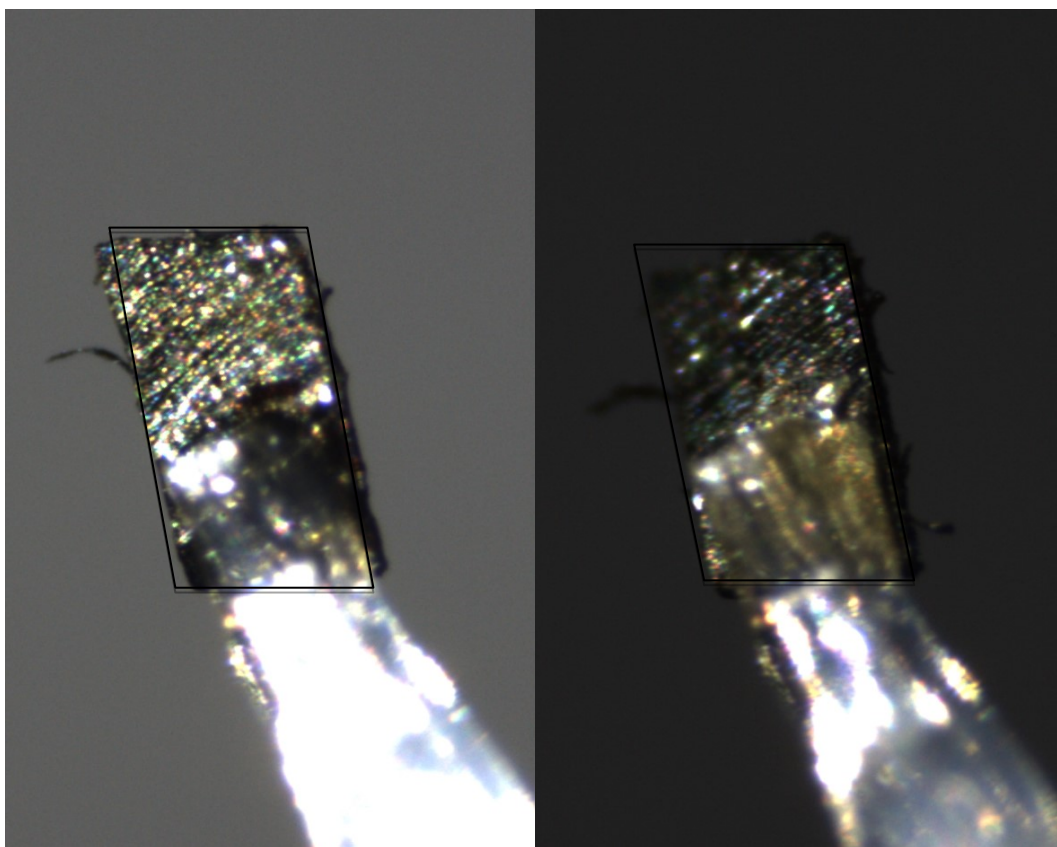

**Figure S5.** Top: Outline of the crystal (**1'**) at 110 K (yellow, left) and 100 K (red, right).  
Below: The shape change of the crystal.



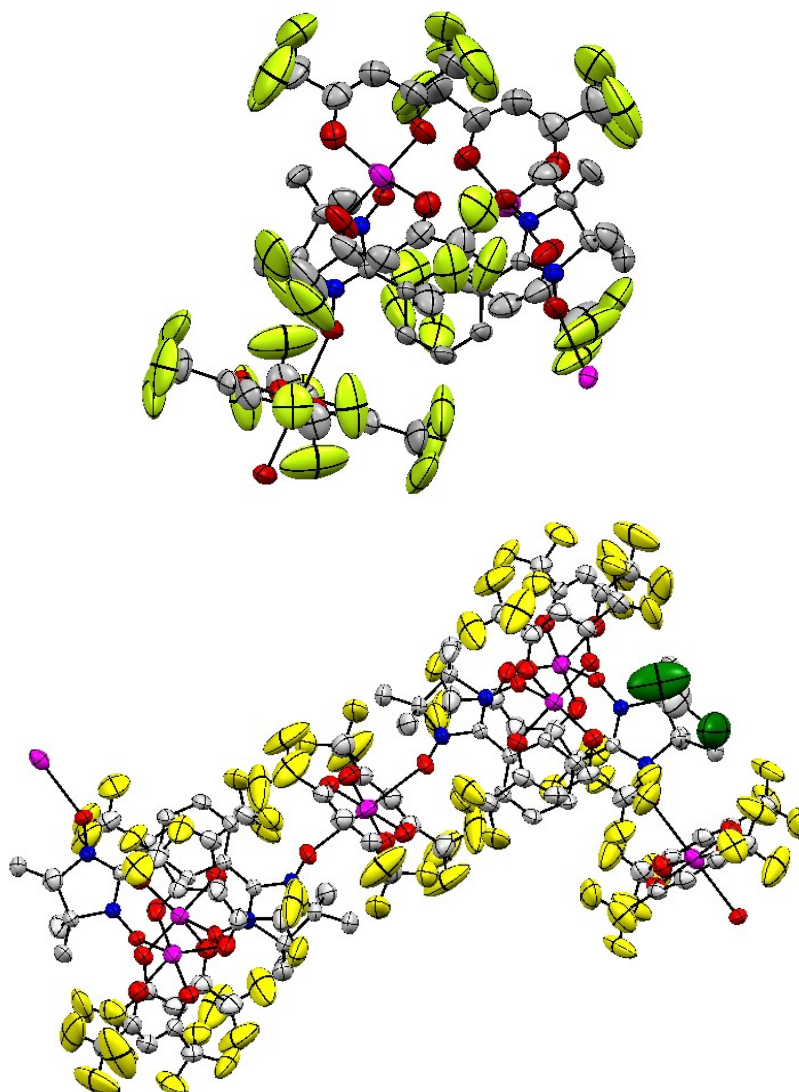

**Figure S6.** ORTEP view of the asymmetric unit of compounds  $\{\text{Cu}^{\text{II}}(\text{hfac})_2\}_3(m\text{-BNN})$  (top) and  $\{[\text{Cu}^{\text{II}}(\text{hfac})_2]_3(m\text{-BNN})\}_n \cdot n\text{CH}_2\text{Cl}_2$  (below). ADPs at 50% probability. Color codes for atoms: magenta spheres, Cu; Red spheres, O; blue spheres, N; grey spheres, C; yellow spheres, F; green spheres, Cl. All hydrogen atoms were omitted for the sake of clarity.

## Magnetic Properties

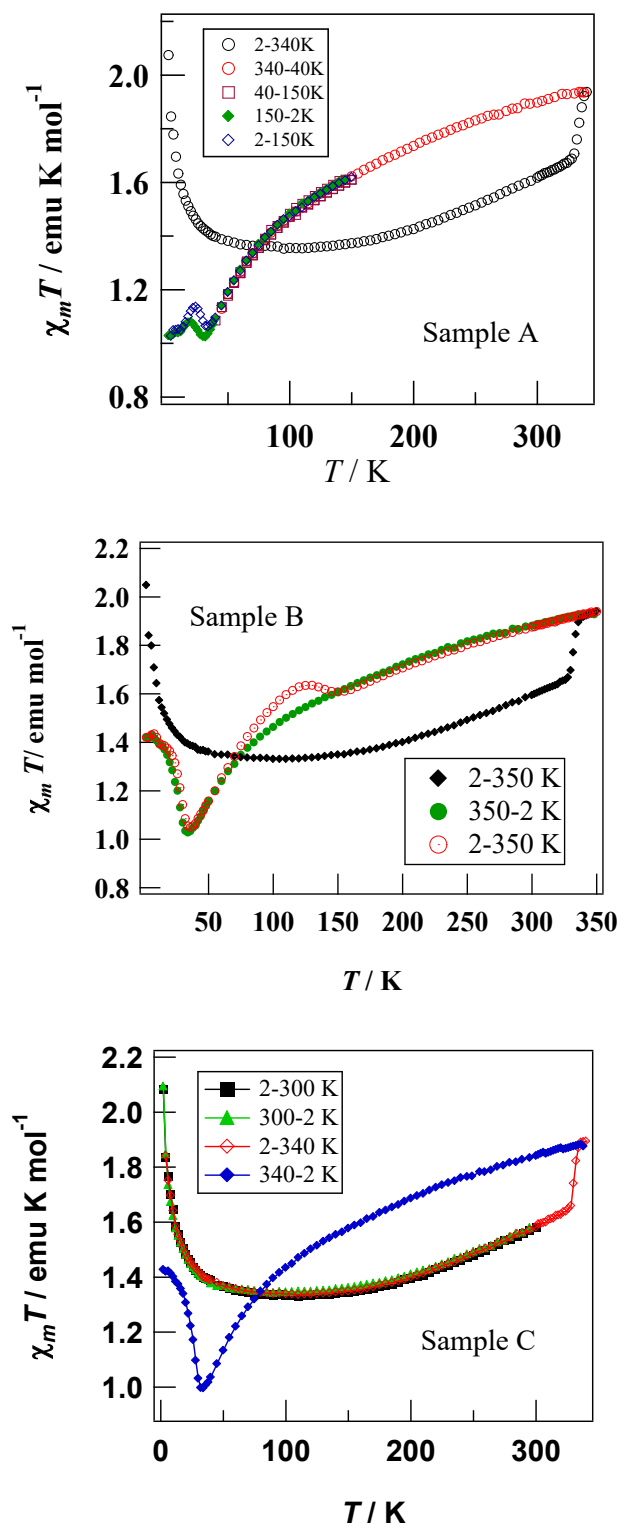

**Figure S7.** Temperature dependence of  $\chi T$  showing (top) the transformation of  $1 \cdot \text{CH}_2\text{Cl}_2$  to **1** at 335 K and the effect of temperature cycling for three samples (A, B and C) from different batches. Top, sample A, 2  $\rightarrow$  340  $\rightarrow$  40  $\rightarrow$  150  $\rightarrow$  2  $\rightarrow$  150 K. Middle, sample B, 2  $\rightarrow$  350  $\rightarrow$  2  $\rightarrow$  300  $\rightarrow$  2  $\rightarrow$  300 K. Below, sample C, 2  $\rightarrow$  300  $\rightarrow$  2  $\rightarrow$  340  $\rightarrow$  2 K.

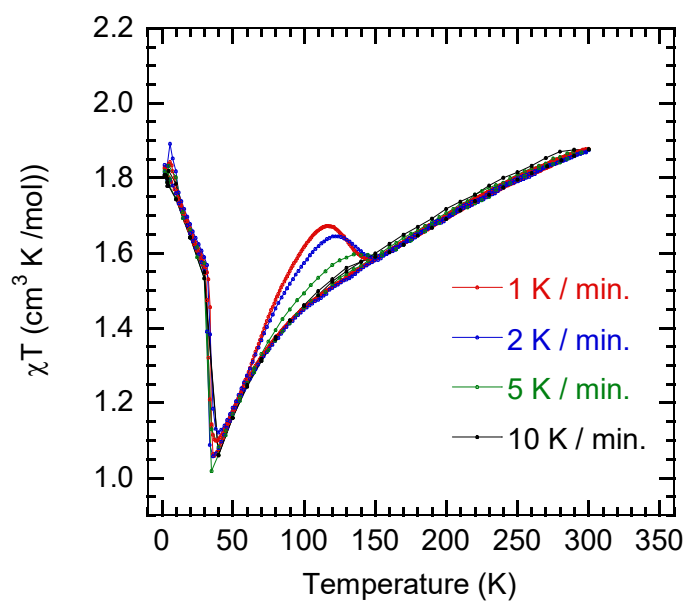

**Figure S8.** Temperature dependence of  $\chi T$  for **1'** as a function of heating and cooling rate. Note the hysteresis between 50 and 150 K for a slow rate of 1 K / min, decreasing progressively through 2, 5 and 10 K / min.

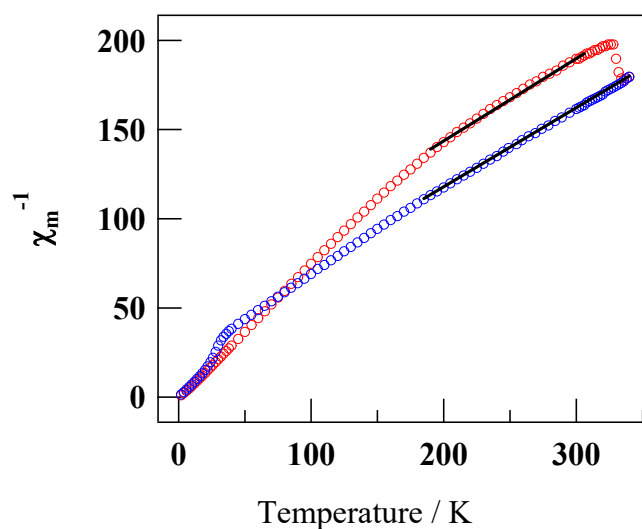

**Figure S9.** Temperature dependence of the product of magnetic susceptibility  $\chi^{-1}(T)$  for **1·CH<sub>2</sub>Cl<sub>2</sub>** (red, 2 → 340 K; blue, 340 → 2 K) and Curie-Weiss fits (black).

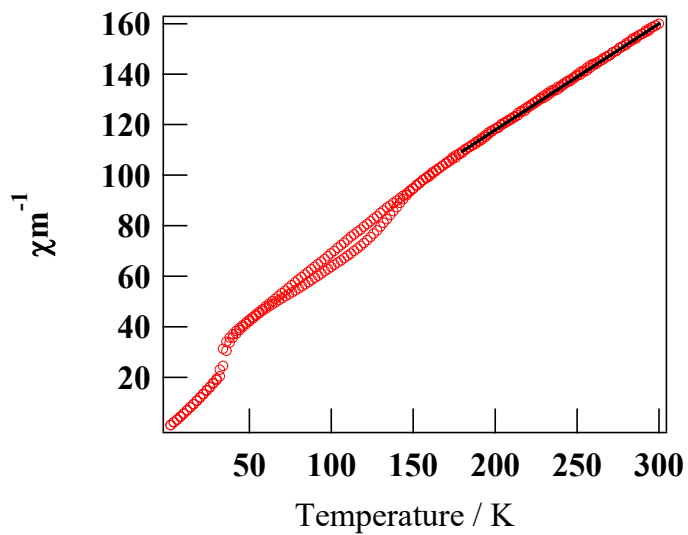

**Figure S10.** Temperature dependence of the product of magnetic susceptibility  $\chi^{-1}(T)$  for **1'** (red) and Curie-Weiss fits (black).

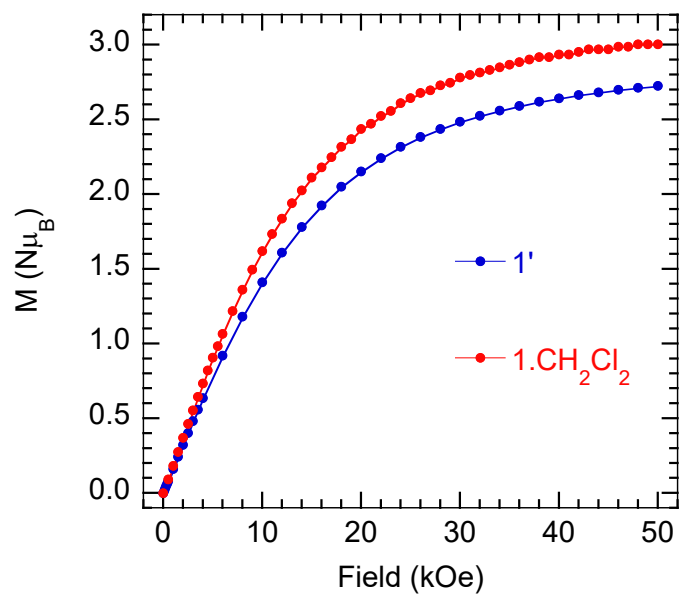

**Figure S11.** Isothermal magnetization at 2 K for **1·CH<sub>2</sub>Cl<sub>2</sub>** and **1'**.
